# Supplementary material
Source: PubMed Central journal article supplement (PMC5293335)
Supplement: CJN.06190616SupplementaryData.pdf [file CJN.06190616SupplementaryData.pdf]

# Supplemental Material

This appendix has been provided by the authors to give readers additional information about this work.

## Contents

**Supplemental Figure 1** Study risks of bias

**Supplemental Figure 2** Funnel plot for the meta-analysis of the risks of all-cause mortality for healthy eating patterns compared to other eating patterns

**Supplemental Table 1** Details of search terms

**Supplemental Table 2** Risk ratios with one study removed

**Supplemental Table 3** Subgroup analysis for the meta-analysis of the risks of all-cause mortality for healthy eating patterns compared to other eating patterns

**Supplemental Figure 1 Quality assessment of included studies using Newcastle-Ottawa scale**

-  Low risk
-  Unclear risk
-  High risk

|                                   | Representativeness of exposed cohort                                                | Selection of non-exposed cohort                                                     | Ascertainment of exposure to eating patterns                                        | Demonstration that outcome was not present at baseline                              | Study accounts for energy intake in analyses                                         | Ascertainment of outcome                                                              | Follow up sufficient for outcomes to occur                                            | Adequacy of follow-up                                                                 |
|-----------------------------------|-------------------------------------------------------------------------------------|-------------------------------------------------------------------------------------|-------------------------------------------------------------------------------------|-------------------------------------------------------------------------------------|--------------------------------------------------------------------------------------|---------------------------------------------------------------------------------------|---------------------------------------------------------------------------------------|---------------------------------------------------------------------------------------|
| Chen et al 2016 <sup>1</sup>      |  |  |  |  |  |  |  |  |
| Gutierrez et al 2014 <sup>2</sup> |  |  |  |  |  |  |  |  |
| Huang et al, 2013 <sup>3</sup>    |  |  |  |  |  |  |  |  |
| Muntner et al, 2013 <sup>4</sup>  |  |  |  |  |  |  |  |  |
| Ricardo et al, 2015 <sup>5</sup>  |  |  |  |  |  |  |  |  |
| Ricardo et al, 2013 <sup>6</sup>  |  |  |  |  |  |  |  |  |
| Tsuruya et al, 2015 <sup>7</sup>  |  |  |  |  |  |  |  |  |

**Supplemental Figure 2** Funnel plot for the meta-analysis of the risks of all-cause mortality for healthy eating patterns compared to other eating patterns

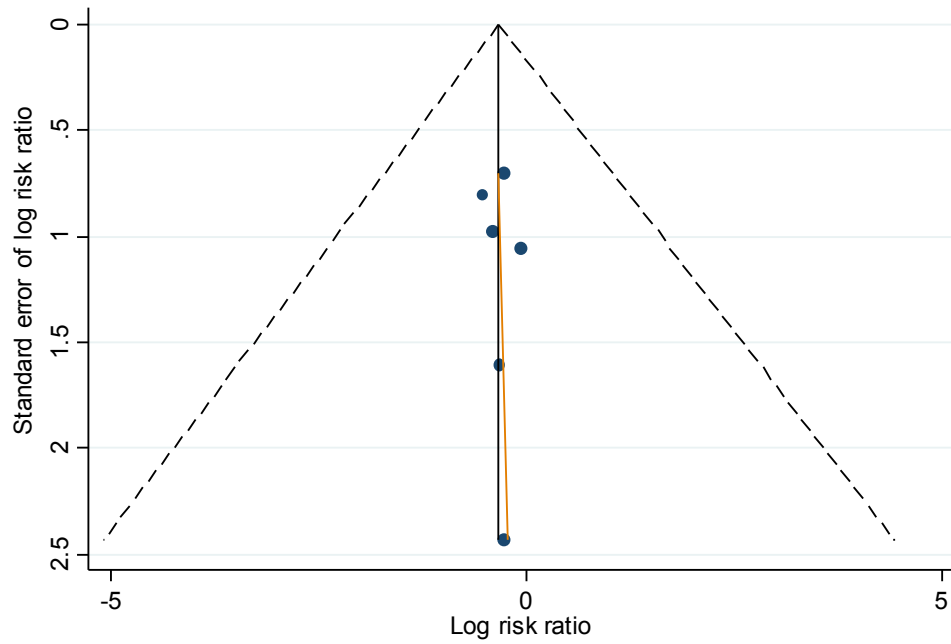

## Supplemental Table 1 Search terms

| Database searched | Search terms                                                                                                                                                                                                                                                                                                                                                                                                                                                                                                                                                                                                                                                                                                                                                                                                                                                                                                                                                                                                                                                                                                                                                                                                                                                                                                                                                                                                                                                                                                                                                                                                              |
|-------------------|---------------------------------------------------------------------------------------------------------------------------------------------------------------------------------------------------------------------------------------------------------------------------------------------------------------------------------------------------------------------------------------------------------------------------------------------------------------------------------------------------------------------------------------------------------------------------------------------------------------------------------------------------------------------------------------------------------------------------------------------------------------------------------------------------------------------------------------------------------------------------------------------------------------------------------------------------------------------------------------------------------------------------------------------------------------------------------------------------------------------------------------------------------------------------------------------------------------------------------------------------------------------------------------------------------------------------------------------------------------------------------------------------------------------------------------------------------------------------------------------------------------------------------------------------------------------------------------------------------------------------|
| Medline           | <p>Kidney Diseases/<br/>           Diabetic Nephropathies/<br/>           exp Renal Replacement Therapy/<br/>           Renal Insufficiency/<br/>           exp Renal Insufficiency, Chronic/<br/>           dialysis.tw.<br/>           (hemodialysis or haemodialysis).tw.<br/>           (hemofiltration or haemofiltration).tw.<br/>           (hemodiafiltration or haemodiafiltration).tw.<br/>           (kidney disease or renal disease or kidney failure or renal failure).tw.<br/>           (ESRF or ESKF or ESRD or ESKD).tw.<br/>           (CKF or CKD or CRF or CRD).tw.<br/>           (CAPD or CCPD or APD).tw.<br/>           (predialysis or pre-dialysis).tw.<br/>           (kidney transplant* or renal transplant* or kidney graft* or renal graft*).tw.<br/>           diabetic nephropath*.tw.<br/>           exp Proteinuria/<br/>           Glomerular Filtration Rate/<br/>           proteinuria.tw.<br/>           albuminuria.tw.<br/>           (glomerular filtration rate or GFR or eGFR).tw.<br/>           or/1-21<br/>           exp Diet/<br/>           Diet Therapy/<br/>           exp Food Habits/<br/>           Fruit/ and Vegetables/<br/>           ((diet or diets or dietary or nutrition*) adj2 (pattern* or quality or guideline*)).tw.<br/>           ((diet or diets or dietary) adj5 (Mediterranean or vegetarian or plant-based or American Heart Association* or DASH or western or seafood)).tw.<br/>           ((diet or diets or dietary or high or increase* or rich) adj5 (fruit* or vegetable* or nut or nuts or fibre or fiber or olive oil or omega-3</p> |

| Database searched | Search terms                                                                                                                                                                                                                 |
|-------------------|------------------------------------------------------------------------------------------------------------------------------------------------------------------------------------------------------------------------------|
|                   | fatty acids or unsaturated or polyunsaturated or monounsaturated or fish or seafood pulses)).tw.                                                                                                                             |
|                   | (food adj2 group*).tw.                                                                                                                                                                                                       |
|                   | healthy eating index.tw.                                                                                                                                                                                                     |
|                   | ((diet or dietary or nutrition*) adj (survey* or record or records or score)).tw.                                                                                                                                            |
|                   | food frequency questionnaire*.tw.                                                                                                                                                                                            |
|                   | diet.tw.                                                                                                                                                                                                                     |
|                   | or/23-34                                                                                                                                                                                                                     |
|                   | and/22,35                                                                                                                                                                                                                    |
|                   | exp Cohort Studies/                                                                                                                                                                                                          |
|                   | between group*.tw.                                                                                                                                                                                                           |
|                   | risk.mp.                                                                                                                                                                                                                     |
|                   | exp Case-Control Studies/                                                                                                                                                                                                    |
|                   | ((cohort or concurrent or longitudinal or follow-up or followup or prospective or retrospective or cross-sectional or case-control) adj2 (analys* or design* or evaluation* or research or study or studies or survey*)).tw. |
|                   | (incidence adj1 (analys* or research or study or studies or survey*)).tw.                                                                                                                                                    |
|                   | or/37-42                                                                                                                                                                                                                     |
|                   | and/36,43                                                                                                                                                                                                                    |
| Embase            | exp renal replacement therapy/                                                                                                                                                                                               |
|                   | kidney disease/                                                                                                                                                                                                              |
|                   | chronic kidney disease/                                                                                                                                                                                                      |
|                   | kidney failure/                                                                                                                                                                                                              |
|                   | chronic kidney failure/                                                                                                                                                                                                      |
|                   | mild renal impairment/                                                                                                                                                                                                       |
|                   | stage 1 kidney disease/                                                                                                                                                                                                      |
|                   | moderate renal impairment/                                                                                                                                                                                                   |
|                   | severe renal impairment/                                                                                                                                                                                                     |
|                   | end stage renal disease/                                                                                                                                                                                                     |
|                   | renal replacement therapy-dependent renal disease/                                                                                                                                                                           |
|                   | kidney transplantation/                                                                                                                                                                                                      |
|                   | diabetic nephropathy/                                                                                                                                                                                                        |
|                   | (hemodialysis or haemodialysis).tw.                                                                                                                                                                                          |

| Database searched | Search terms                                                                                                                                                                                                                                     |
|-------------------|--------------------------------------------------------------------------------------------------------------------------------------------------------------------------------------------------------------------------------------------------|
|                   | (hemofiltration or haemofiltration).tw.                                                                                                                                                                                                          |
|                   | (hemodiafiltration or haemodiafiltration).tw.                                                                                                                                                                                                    |
|                   | (kidney disease* or renal disease* or kidney failure or renal failure).tw.                                                                                                                                                                       |
|                   | (kidney transplant* or renal transplant* or kidney graft* or renal graft*).tw.                                                                                                                                                                   |
|                   | (ESRF or ESKF or ESRD or ESKD).tw.                                                                                                                                                                                                               |
|                   | (CKF or CKD or CRF or CRD).tw.                                                                                                                                                                                                                   |
|                   | (CAPD or CCPD or APD).tw.                                                                                                                                                                                                                        |
|                   | dialysis.tw.                                                                                                                                                                                                                                     |
|                   | predialysis.tw.                                                                                                                                                                                                                                  |
|                   | diabetic nephropath*.tw.                                                                                                                                                                                                                         |
|                   | exp Proteinuria/<br>glomerulus filtration rate/<br>proteinuria.tw.                                                                                                                                                                               |
|                   | albuminuria.tw.                                                                                                                                                                                                                                  |
|                   | (glomerular filtration rate or GFR or eGFR).tw.                                                                                                                                                                                                  |
|                   | or/1-29                                                                                                                                                                                                                                          |
|                   | exp diet/<br>diabetic diet/<br>low fat diet/<br>diet therapy/<br>dietary intake/<br>Fruit/ and Vegetable/<br>((diet or diets or dietary or nutrition*) adj2 (pattern* or quality or guideline*)).tw.                                             |
|                   | ((diet or diets or dietary) adj5 (Mediterranean or vegetarian or plant-based or American Heart Association* or DASH or western or seafood)).tw.                                                                                                  |
|                   | ((diet or diets or dietary or high or increase* or rich) adj5 (fruit* or vegetable* or nut or nuts or fibre or fiber or olive oil or omega-3 fatty acids or unsaturated or polyunsaturated or monounsaturated or fish or seafood or pulses)).tw. |
|                   | (food adj2 group*).tw.                                                                                                                                                                                                                           |
|                   | healthy eating index.tw.                                                                                                                                                                                                                         |

| Database searched | Search terms                                                                                                                                                                                                                 |
|-------------------|------------------------------------------------------------------------------------------------------------------------------------------------------------------------------------------------------------------------------|
|                   | ((diet or dietary or nutrition*) adj (survey* or record or records or score)).tw.                                                                                                                                            |
|                   | food frequency questionnaire*.tw.                                                                                                                                                                                            |
|                   | diet.tw.                                                                                                                                                                                                                     |
|                   | or/31-44                                                                                                                                                                                                                     |
|                   | and/30,45                                                                                                                                                                                                                    |
|                   | risk*.mp.                                                                                                                                                                                                                    |
|                   | case-control study/                                                                                                                                                                                                          |
|                   | longitudinal study/                                                                                                                                                                                                          |
|                   | retrospective study/                                                                                                                                                                                                         |
|                   | prospective study/                                                                                                                                                                                                           |
|                   | cohort analysis/                                                                                                                                                                                                             |
|                   | cross-sectional study/                                                                                                                                                                                                       |
|                   | cohort analysis/                                                                                                                                                                                                             |
|                   | health survey/                                                                                                                                                                                                               |
|                   | incidence/                                                                                                                                                                                                                   |
|                   | between group*.tw.                                                                                                                                                                                                           |
|                   | ((cohort or concurrent or longitudinal or follow-up or followup or prospective or retrospective or cross-sectional or case-control) adj2 (analys* or design* or evaluation* or research or study or studies or survey*)).tw. |
|                   | (incidence adj1 (analys* or research or study or studies or survey*)).tw.                                                                                                                                                    |
|                   | or/47-59                                                                                                                                                                                                                     |
|                   | and/46,60                                                                                                                                                                                                                    |

**Supplemental Table 2 Risk ratio for all-cause mortality in sequential meta-analyses with one study removed**

| <b>Study removed</b>        | <b>Cohort</b> | <b>Risk ratio of all-cause mortality with study removed</b> | <b>p-value for association</b> | <b>Risk ratio of ESKD with study removed</b> | <b>p-value for association</b> |
|-----------------------------|---------------|-------------------------------------------------------------|--------------------------------|----------------------------------------------|--------------------------------|
| Chen 2016 <sup>1</sup>      | NHANES III    | 0.77 (0.66 to 0.90)                                         | 0.001                          | --                                           | --                             |
| Gutiérrez 2014 <sup>2</sup> | REGARDS       | 0.74 (0.61 to 0.90)                                         | 0.002                          | 0.97 (0.64 to 1.48)                          | 0.89                           |
| Huang 2013 <sup>3</sup>     | Uppsala       | 0.75 (0.64 to 0.88)                                         | 0.001                          | --                                           | --                             |
| Muntner 2013 <sup>4</sup>   | REGARDS       | 0.79 (0.68 to 0.92)                                         | 0.003                          | 1.06 (0.74 to 1.54)                          | 0.75                           |
| Ricardo 2015 <sup>5</sup>   | CRIC          | 0.75 (0.64 to 0.88)                                         | <0.001                         | 1.12 (0.74 to 1.69)                          | 0.60                           |
| Ricardo 2013 <sup>6</sup>   | NHANES        | 0.70 (0.60 to 0.83)                                         | <0.001                         | --                                           | --                             |

NHANES III - Third National Health and Nutrition Examination Survey; REGARDS - Reasons for Geographic and Racial Differences in Stroke study; Uppsala - Uppsala Longitudinal Study of Adult Men; CRIC - Chronic Renal Insufficiency Cohort (CRIC) Study. The remaining study by Tsuruya et al was not included in the meta-analysis.<sup>7</sup>



### Supplemental Table 3 Subgroup analysis for all-cause mortality

| Variable (No of studies) | Relative risk (95% CI) |
|--------------------------|------------------------|
| Duration:                |                        |
| <6.3 years (3)           | 0.63 (0.48 to 0.78)    |
| >6.3 years (3)           | 0.81 (0.67 to 0.95)    |
| Country of origin:       |                        |
| USA (5)                  | 0.73 (0.61 to 0.85)    |
| Other (1)                | 0.73 (0.63 to 0.83)    |
| Age:                     |                        |
| > 60 years (3)           | 0.69 (0.57 to 0.82)    |
| < 60 years (2)           | 0.73 (0.63 to 0.83)    |
| Study quality:           |                        |
| Lower (4)                | 0.72 (0.55 to 0.89)    |
| Higher (2)               | 0.73 (0.63 to 0.83)    |

## Supplemental References

1. Chen X, Wei G, Jalili T, et al. The associations of plant protein intake with all-cause mortality in CKD. *Am J Kidney Dis* 2016;**67**(3):423-30.
2. Gutierrez OM, Muntner P, Rizk DV, et al. Dietary patterns and risk of death and progression to ESRD in individuals with CKD: a cohort study. *Am J Kidney Dis* 2014;**64**(2):204-13.
3. Huang X, Jimenez-Moleon JJ, Lindholm B, et al. Mediterranean diet, kidney function, and mortality in men with CKD. *Clin J Am Soc Nephrol* 2013;**8**(9):1548-55.
4. Muntner P, Judd SE, Gao L, et al. Cardiovascular risk factors in CKD associate with both ESRD and mortality. *J Am Soc Nephrol* 2013;**24**(7):1159-65.
5. Ricardo AC, Anderson CA, Yang W, et al. Healthy lifestyle and risk of kidney disease progression, atherosclerotic events, and death in CKD: findings from the Chronic Renal Insufficiency Cohort (CRIC) Study. *Am J Kidney Dis* 2015;**65**(3):412-24.
6. Ricardo AC, Madero M, Yang W, et al. Adherence to a healthy lifestyle and all-cause mortality in CKD. *Clin J Am Soc Nephrol* 2013;**8**(4):602-9.
7. Tsuruya K, Fukuma S, Wakita T, et al. Dietary patterns and clinical outcomes in hemodialysis patients in Japan: a cohort study. *PLoS One* 2015;**10**(1):e0116677.
